## Supplemental Figures

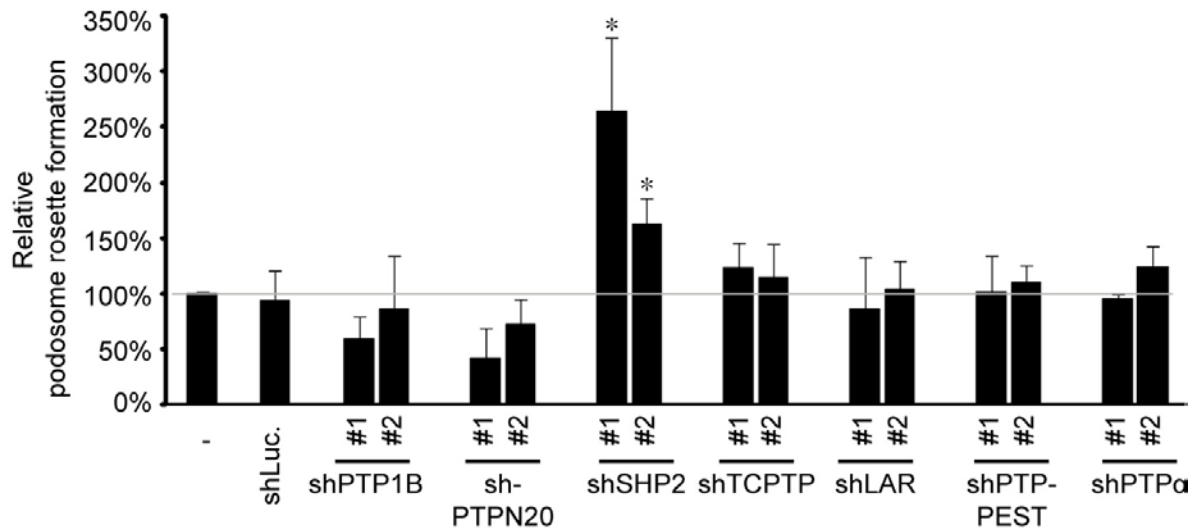

**Fig. S1. Examination of the role of PTPs in podosome rosette formation using shRNAs.** v-Src-transformed MEFs were infected with recombinant lentiviruses encoding shRNAs specific to luciferase (shLuc.), PTP1B (shPTP1B; clones #1 and #2), SHP2 (shSHP2; clones #1 and #2), TCPTP (shTCPTP; clones #1 and #2), LAR (shLAR; clones #1 and #2), PTP-PEST (shPTP-PEST; clones #1 and #2), or PTP $\alpha$  (shPTP $\alpha$ ; clones #1 and #2). Equal numbers ( $2 \times 10^5$ ) of cells were seeded on fibronectin-coated coverslips for 48 h, fixed, and stained for F-actin. The percentage of cells containing podosome rosettes relative to the total counted cells ( $n \geq 400$ ) was determined and expressed as a percentage relative to the level in control v-Src-transformed MEFs, which was defined as 100%. The values (mean  $\pm$  s.d.) are from three independent experiments. \*,  $P < 0.05$  (compared with cells expressing shLuc).

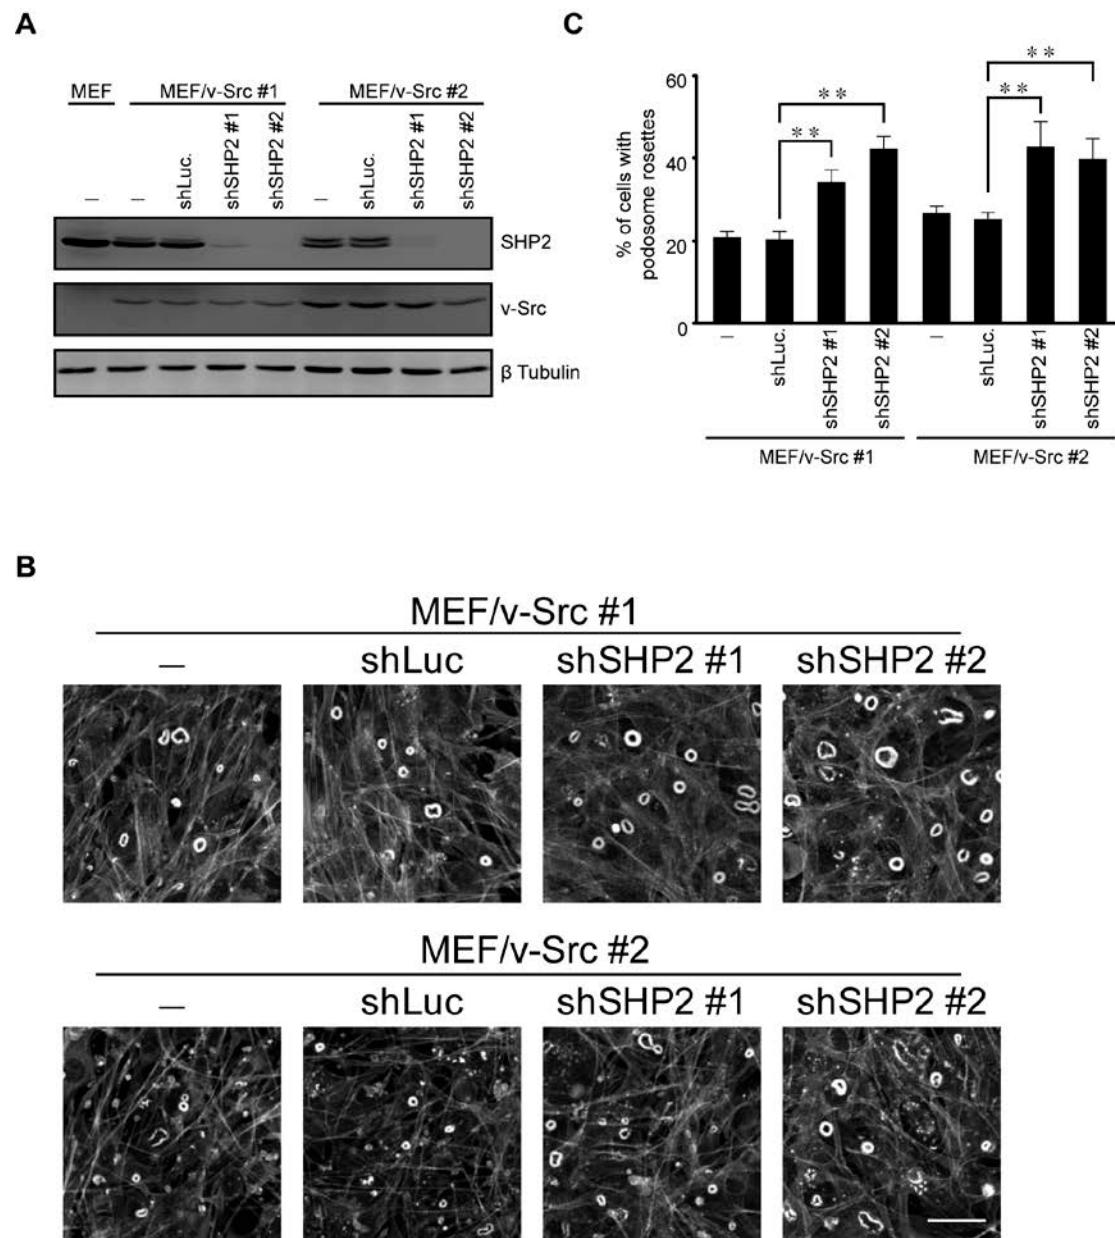

**Fig. S2. Knockdown of SHP2 by shRNA increases the formation of podosome rosettes in Src-transformed MEFs.** (A) Two independent clones of v-Src-transformed MEFs (MEF/v-Src; clones #1 and #2) were infected with recombinant lentiviruses encoding shRNAs specific to luciferase (shLuc.), or SHP2 (shSHP2; clones #1 and #2). An equal amount of whole cell lysates was analyzed by immunoblotting with the indicated antibodies. (B) The cells were grown on fibronectin-coated coverslips for 48 h and then stained for F-actin and cortactin as a marker for podosomes. Scale bar: 50  $\mu$ m. (C) Quantitative results of podosome rosettes. The percentage of the cells containing podosome rosettes in total counted cells ( $n \geq 500$ ) was determined. Values (means  $\pm$  s.d.) are from three independent experiments. \*\*,  $P < 0.005$ .

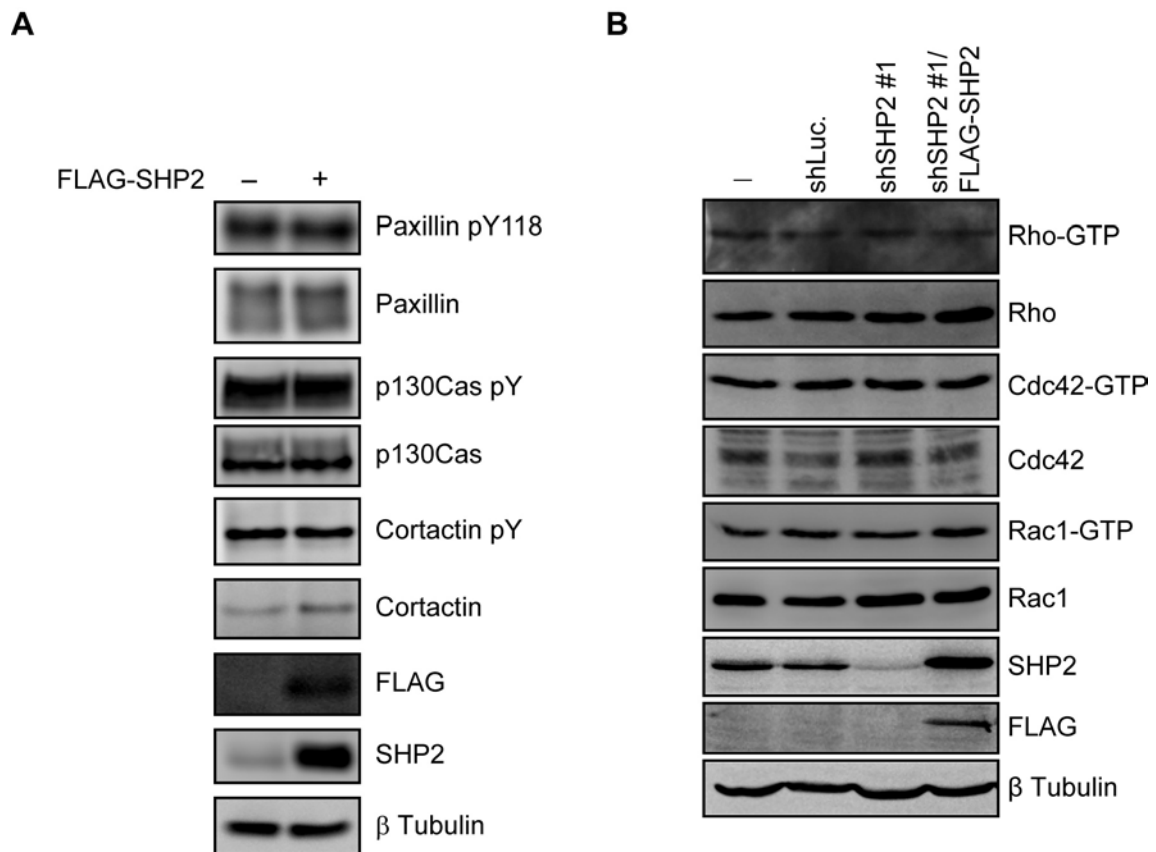

**Fig. S3. SHP2 does not affect the tyrosine phosphorylation of paxillin, p130Cas, and cortactin or the activity of Rho, Rac, and Cdc42.** (A) The tyrosine phosphorylation of paxillin, p130Cas, and cortactin in v-Src-transformed MEFs with or without FLAG-SHP2 overexpression was analyzed. (B) shRNAs specific to SHP2 (shSHP2; clone #1) or luciferase (shLuc) were stably expressed in v-Src-transformed MEFs. FLAG-SHP2 was re-expressed in the cells expressing shSHP2#1 (shSHP2#1/FLAG-SHP2). The activities of Rho family proteins (Rho, Rac, and Cdc42) were analyzed.

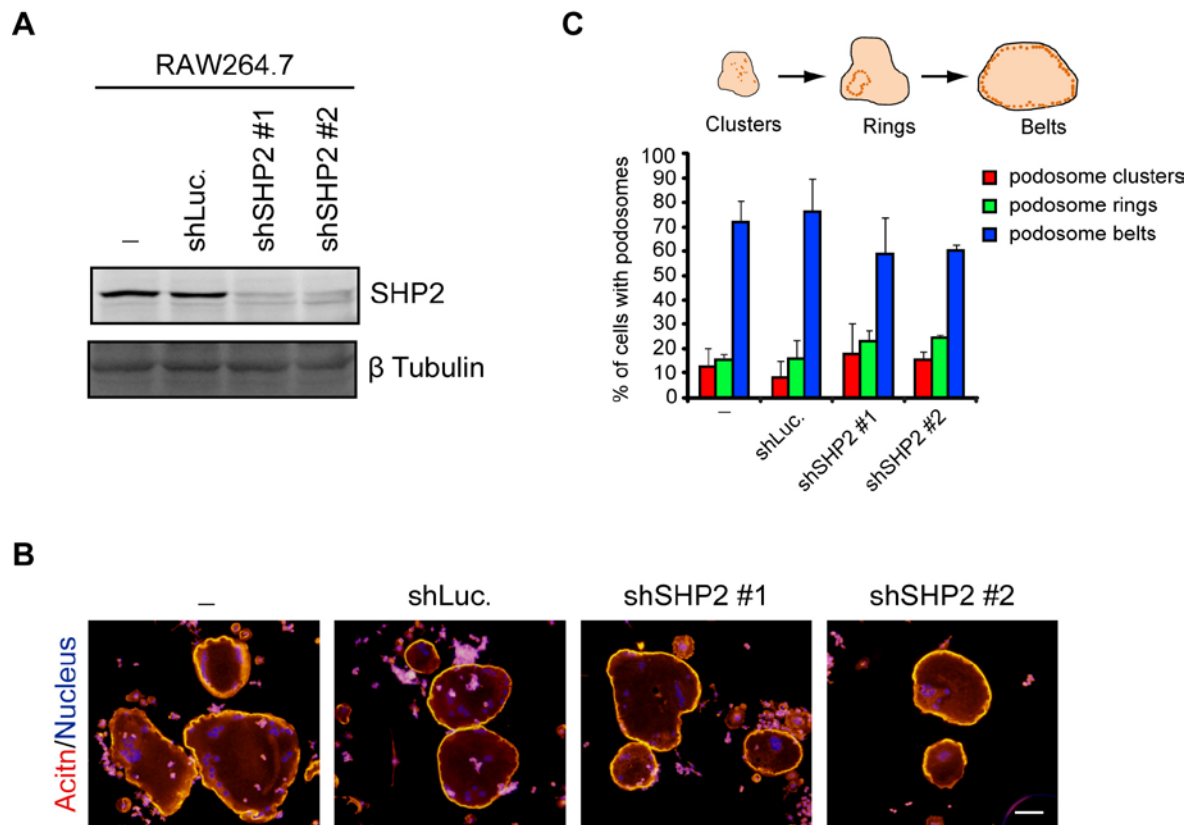

**Fig. S4. Knockdown of SHP2 does not affect podosomal organization in RAW264.7 cells.** (A) RAW264.7 cells were infected with recombinant lentiviruses encoding shRNAs specific to luciferase (shLuc.), or SHP2 (shSHP2; clones #1 and #2). Equal amounts of whole cell lysates were analyzed by immunoblotting with the indicated antibodies. (B) Cells were seeded on collagen-coated glass coverslips and treated with GST-RANKL (100 ng/ml) for 7 days. The cells were fixed and stained for F-actin and nuclei. Scale bar: 20  $\mu$ m. (C) Quantitative results of podosomal organization in RANKL-treated RAW264.7 cells. Cells containing more than three nuclei were defined as differentiated osteoclasts. The percentage of cells containing podosomes (clusters, rings, and belts) relative to the total counted osteoclasts ( $n \geq 100$ ) was determined. The values (mean  $\pm$  s.d.) are from three independent experiments.
